# Supplementary material for: Characterization of Immunodominant BK Polyomavirus 9mer Epitope T Cell Responses
Source: PubMed Central journal article supplement — Am J Transplant. 2016 Feb 17;16(4):1193–206. doi: 10.1111/ajt.13598 (PMC5067673; doi:10.1111/ajt.13598), 2016-02-17
Supplement: AJT-16-1193-s004.pdf [file AJT-16-1193-s004.pdf]

**Supplementary Table 2: Characteristics of 19 pediatric kidney transplant recipients**

| Patient | Gender | Age (years) | BKPyV high viruria | BKPyV viremia | HLA-A |    | HLA-B |    | HLA-DR |    | HLA-A (donor) |    | HLA-B (donor) |    | HLA-DR (donor) |    |
|---------|--------|-------------|--------------------|---------------|-------|----|-------|----|--------|----|---------------|----|---------------|----|----------------|----|
| KTR-1   | f      | 17          | -                  | -             | 29    | 33 | 8     | 14 | 3      | 3  | 32            | 33 | 8             | 14 | 1              | 3  |
| KTR-2   | m      | 21          | -                  | -             | 29    | 32 | 44    | 51 | 11     | 11 | 2             | 29 | 13            | 44 | 7              | 11 |
| KTR-3   | m      | 15          | -                  | -             | 2     | 26 | 39    | 62 | 16     | 17 | 2             | 30 | 13            | 39 | 3              | 16 |
| KTR-4   | f      | 16          | +                  | -             | 1     | 31 | 37    | 38 | 7      | 11 | 1             | 24 | 51            | 51 | 4              | 11 |
| KTR-5   | f      | 17          | +                  | -             | 2     | 24 | 18    | 35 | 11     | 13 | 33            | 33 | 58            | 58 | 3              | 14 |
| KTR-6   | f      | 25          | +                  | -             | 1     | 2  | 51    | 64 | 7      | 8  | 1             | 1  | 64            | 57 | 7              | 7  |
| KTR-7   | f      | 27          | +                  | -             | 2     | 3  | 60    | 60 | 4      | 11 | 2             | 32 | 39            | 18 | 11             | 11 |
| KTR-8   | m      | 26          | +                  | -             | 2     | 30 | 51    | 53 | 11     | 13 | 2             | 24 | 8             | 39 | 3              | 13 |
| KTR-9   | m      | 13          | +                  | -             | 1     | 2  | 50    | 51 | 7      | 13 | 2             | 25 | 18            | 51 | 4              | 4  |
| KTR-10  | m      | 15          | +                  | -             | 11    | 26 | 7     | 55 | 14     | 15 | 2             | 23 | 18            | 27 | 15             | 15 |
| KTR-11  | m      | 14          | +                  | +             | 2     | 24 | 38    | 41 | 4      | 8  | 25            | 26 | 15            | 35 | 4              | 4  |
| KTR-12  | m      | 12          | +                  | +             | 2     | 24 | 51    | 65 | 13     | 14 | 1             | 3  | 8             | 16 | 13             | 7  |
| KTR-13  | f      | 14          | +                  | +             | 2     | 30 | 49    | 51 | 7      | 13 | 1             | 11 | 49            | 55 | 11             | 14 |

|               |   |    |   |   |    |    |    |    |    |    |    |    |    |    |    |    |
|---------------|---|----|---|---|----|----|----|----|----|----|----|----|----|----|----|----|
| <b>KTR-14</b> | m | 18 | + | + | 2  | 2  | 13 | 35 | 7  | 7  | 2  | 2  | 35 | 44 | 4  | 14 |
| <b>KTR-15</b> | m | 16 | + | + | 11 | 24 | 40 | 44 | 7  | 13 | 2  | 2  | 35 | 47 | 13 | 13 |
| <b>KTR-16</b> | m | 9  | + | + | 3  | 11 | 18 | 35 | 1  | 11 | 2  | 11 | 35 | 44 | 1  | 7  |
| <b>KTR-17</b> | m | 18 | + | + | 2  | 24 | 18 | 35 | 11 | 13 | 2  | 2  | 49 | 51 | 10 | 11 |
| <b>KTR-18</b> | m | 18 | + | + | 3  | 32 | 7  | 44 | 1  | 15 | 25 | 32 | 17 | 35 | 4  | 15 |
| <b>KTR-19</b> | m | 8  | + | + | 2  | 2  | 18 | 35 | 11 | 11 | 2  | 9  | 5  | 35 | 11 | 14 |

KTR, kidney transplant recipient; m, male; f, female
