# Supplementary material for: Characterization of Immunodominant BK Polyomavirus 9mer Epitope T Cell Responses
Source: PubMed Central journal article supplement — Am J Transplant. 2016 Feb 17;16(4):1193–206. doi: 10.1111/ajt.13598 (PMC5067673; doi:10.1111/ajt.13598), 2016-02-17
Supplement: AJT-16-1193-s005.pdf [file AJT-16-1193-s005.pdf]

**Table S3: HLA allele frequencies in worldwide populations\***

\*Data were retrieved from <http://www.allelefrequencies.net>

| A*01:01                         |               | A*02:01                                  |               | A*03:01                         |               |
|---------------------------------|---------------|------------------------------------------|---------------|---------------------------------|---------------|
| Population                      | Frequency (%) | Population                               | Frequency (%) | Population                      | Frequency (%) |
| Ireland South                   | 44.8          | Argentina Gran Chaco Western Toba Pilaga | 60.0          | Belgium                         | 30.2          |
| England North West              | 38.6          | Mexico Mestizo                           | 56.1          | Austria                         | 28.0          |
| Ireland Northern                | 36.4          | Greece pop 8                             | 51.8          | Ireland Northern                | 26.3          |
| USA Caucasian Bethesda          | 28.7          | Argentina Gran Chaco Eastern Toba        | 46.4          | England North West              | 25.5          |
| Belgium                         | 29.2          | Philippines Ivatan                       | 48.0          | France Southeast                | 23.8          |
| Italy North pop 3               | 26.9          | Austria                                  | 48.0          | USA African American Bethesda   | 23.8          |
| Sudan Central Shaigiya Mixed    | 27.8          | Italy North pop 3                        | 53.8          | Romania                         | 21.8          |
| France Southeast                | 27.7          | England North West                       | 50.7          | Ireland South                   | 21.6          |
| Austria                         | 27.0          | Italy Bergamo                            | 46.5          | USA Philadelphia Caucasian      | 21.5          |
| Greece pop 8                    | 25.3          | Ireland Northern                         | 46.8          | USA Caucasian Bethesda          | 20.6          |
| Romania                         | 23.0          | Belgium                                  | 50.0          | Italy North pop 3               | 19.2          |
| USA Philadelphia Caucasian      | 21.5          | USA Caucasian Bethesda                   | 47.8          | Ghana Ga-Adangbe                | 19.1          |
| Saudi Arabia Guraiaat and Hail  | 21.6          | USA Philadelphia Caucasian               | 40.7          | Brazil Belo Horizonte Caucasian | 17.9          |
| Tunisia                         | 21.0          | Romania                                  | 43.7          | Cuba Mulatto                    | 16.7          |
| India Delhi pop 2               | 20.0          | Ireland South                            | 43.6          | Cuba Caucasian                  | 15.7          |
| Mexico Mestizo                  | 14.6          | Brazil Belo Horizonte Caucasian          | 43.2          | Greece pop 8                    | 15.7          |
| Cuba Caucasian                  | 15.7          | Argentina Gran Chaco Mataco Wichi        | 40.9          | Saudi Arabia Guraiaat and Hail  | 14.1          |
| Brazil Belo Horizonte Caucasian | 13.7          | Oman                                     | 39.8          | India Delhi pop 2               | 13.3          |
| Argentina Rosario Toba          | 15.1          | France Southeast                         | 38.5          | Chile Santiago Mixed            | 13.0          |
| USA African American Bethesda   | 14.8          | Brazil Terena                            | 38.3          | Tunisia                         | 13.0          |
| Oman                            | 14.4          | Argentina Rosario Toba                   | 34.9          | South Africa Natal Zulu         | 12.0          |
| Cuba Mulatto                    | 14.3          | Taiwan Taroko                            | 36.4          | Sudan Mixed                     | 9.5           |
| Chile Santiago Mixed            | 11.0          | Saudi Arabia Guraiaat and Hail           | 33.3          | Oman                            | 9.3           |
| Sudan Mixed                     | 10.0          | Cuba Caucasian                           | 34.3          | Mexico Mestizo                  | 4.9           |
| South Africa Natal Zulu         | 8.0           | Cuba Mulatto                             | 31.0          | Indonesia Java Western          | 4.7           |
| Indonesia Java Western          | 5.1           | Tunisia                                  | 32.0          | Argentina Rosario Toba          | 3.5           |
| Ghana Ga-Adangbe                | 4.6           | Sudan Mixed                              | 33.0          | Hong Kong Chinese               | 1.6           |
| Hong Kong Chinese               | 2.1           | Chile Santiago Mixed                     | 30.0          | Singapore Chinese               | 1.3           |
| Taiwan Minnan pop 1             | 1.0           | Taiwan Saisiat                           | 21.6          |                                 |               |
| Singapore Chinese               | 0.7           | Ghana Ga-Adangbe                         | 19.1          |                                 |               |
|                                 |               | Singapore Chinese                        | 19.5          |                                 |               |
|                                 |               | Sudan East Rashaida                      | 18.5          |                                 |               |
|                                 |               | Taiwan Minnan pop 1                      | 17.6          |                                 |               |

|  |  |                               |      |  |  |
|--|--|-------------------------------|------|--|--|
|  |  | USA African American Bethesda | 16.8 |  |  |
|  |  | Taiwan Thao                   | 13.3 |  |  |
|  |  | Taiwan Atayal                 | 13.2 |  |  |
|  |  | Indonesia Java Western        | 12.7 |  |  |
|  |  | Hong Kong Chinese             | 11.9 |  |  |
|  |  | Sudan Central Shaigiya Mixed  | 11.1 |  |  |
|  |  | Taiwan Hakka                  | 10.9 |  |  |
|  |  | Taiwan Pazeh                  | 10.9 |  |  |
|  |  | Taiwan Bunun                  | 7.9  |  |  |
|  |  | Taiwan Paiwan                 | 7.8  |  |  |
|  |  | Taiwan Siraya                 | 7.8  |  |  |
|  |  | Taiwan Rukai                  | 6.0  |  |  |
|  |  | Taiwan Tsou                   | 5.9  |  |  |
|  |  | Taiwan Ami                    | 5.1  |  |  |
|  |  | South Africa Natal Zulu       | 5.0  |  |  |
|  |  | Taiwan Puyuma                 | 4.0  |  |  |
|  |  | Taiwan Tao                    | 4.0  |  |  |
|  |  | India Delhi pop 2             | 3.3  |  |  |

| A*11:01                |               | A*24:02                |               | A*32:01                      |               |
|------------------------|---------------|------------------------|---------------|------------------------------|---------------|
| Population             | Frequency (%) | Population             | Frequency (%) | Population                   | Frequency (%) |
| Taiwan Tao             | 62.0          | Taiwan Tsou            | 98.0          | Oman                         | 18.6          |
| Taiwan Hakka           | 60.0          | Taiwan Paiwan          | 96.1          | Greece pop 8                 | 16.9          |
| Taiwan Minnan pop 1    | 54.9          | Taiwan Rukai           | 96.0          | Sudan East Rashaida          | 14.8          |
| Taiwan Pazeh           | 50.9          | Taiwan Thao            | 90.0          | Sudan Central Shaigiya Mixed | 13.9          |
| Hong Kong Chinese      | 48.8          | Taiwan Puyuma          | 88.0          | France Southeast             | 13.8          |
| Singapore Chinese      | 47.7          | Taiwan Saisiat         | 86.3          | Italy Bergamo                | 11.9          |
| Taiwan Thao            | 43.3          | Taiwan Ami             | 84.7          | Sudan Mixed                  | 11.0          |
| Taiwan Siraya          | 33.3          | Taiwan Bunun           | 84.2          | Scotland Orkney              | 10.0          |
| Indonesia Java Western | 30.1          | Taiwan Atayal          | 82.1          | Romania                      | 9.8           |
| Taiwan Saisiat         | 21.6          | Taiwan Siraya          | 78.4          | Ireland South                | 8.8           |
| Taiwan Tsou            | 21.6          | Taiwan Tao             | 78.0          | USA Philadelphia Caucasian   | 7.4           |
| Oman                   | 21.2          | Taiwan Taroko          | 72.7          | Belgium                      | 7.3           |
| India Delhi pop 2      | 18.9          | Taiwan Pazeh           | 58.2          | Cuba Caucasian               | 7.1           |
| Taiwan Bunun           | 18.8          | Philippines Ivatan     | 58.0          | Cuba Mulatto                 | 7.1           |
| Romania                | 15.8          | Taiwan Minnan pop 1    | 34.3          | Morocco Settat Chaouya       | 6.8           |
| Italy North pop 3      | 15.4          | Indonesia Java Western | 25.8          | Ireland Northern             | 6.1           |
| Taiwan Atayal          | 15.1          | Taiwan Hakka           | 25.5          | India Delhi pop 2            | 5.6           |
| Ireland Northern       | 15.0          | Romania                | 23.8          | Austria                      | 5.5           |
| Taiwan Taroko          | 14.5          | Greece pop 8           | 21.7          | England North West           | 5.4           |
| Philippines Ivatan     | 14.0          | USA Caucasian Bethesda | 20.6          | South Africa Natal Zulu      | 5.0           |





|                                   |     |                                 |      |                               |     |
|-----------------------------------|-----|---------------------------------|------|-------------------------------|-----|
| Singapore Chinese                 | 4.7 | Hong Kong Chinese               | 28.0 | Morocco Settata Chaouya       | 6.8 |
| Romania                           | 4.6 | Taiwan Puyuma                   | 26.0 | Italy North pop 3             | 6.7 |
| Morocco Settata Chaouya           | 4.2 | Taiwan Siraya                   | 25.5 | Chile Santiago Mixed          | 6.0 |
| Taiwan Minnan pop 1               | 3.9 | USA Caucasian Bethesda          | 12.4 | USA African American Bethesda | 4.2 |
| France Southeast                  | 3.8 | Belgium                         | 12.2 | Sudan East Rashaida           | 3.7 |
| USA Caucasian Bethesda            | 3.8 | Cuba Mulatto                    | 11.9 | Cuba Mulatto                  | 2.4 |
| Taiwan Pazeh                      | 3.6 | England North West              | 11.4 | Sudan Mixed                   | 1.5 |
| Argentina Gran Chaco Eastern Toba | 3.5 | USA Caucasian                   | 11.0 | India Delhi pop 2             | 1.1 |
| Serbia pop 2                      | 2.9 | Ireland Northern                | 10.2 | Saudi Arabia Guraia and Hail  | 0.5 |
| Hong Kong Chinese                 | 2.8 | India Jalpaiguri Toto           | 10.0 | Hong Kong Chinese             | 0.4 |
| Greece pop 8                      | 2.4 | USA Philadelphia Caucasian      | 8.1  |                               |     |
| Cuba Mulatto                      | 2.4 | Indonesia Java Western          | 7.2  |                               |     |
| Ireland South                     | 2.0 | Japan Hyogo                     | 6.3  |                               |     |
| Taiwan Siraya                     | 2.0 | Austria                         | 6.0  |                               |     |
| Ireland Northern                  | 1.8 | Taiwan Tao                      | 6.0  |                               |     |
| Brazil Terena                     | 1.7 | Scotland Orkney                 | 5.9  |                               |     |
| Austria                           | 1.5 | Brazil Belo Horizonte Caucasian | 5.3  |                               |     |
| England North West                | 1.3 | Ireland South                   | 5.2  |                               |     |
| India Delhi pop 2                 | 1.1 | France Southeast                | 4.6  |                               |     |
| USA Philadelphia Caucasian        | 0.7 | Romania                         | 4.6  |                               |     |
| Saudi Arabia Guraia and Hail      | 0.5 | Cuba Caucasian                  | 4.3  |                               |     |
|                                   |     | USA African American Bethesda   | 4.2  |                               |     |
|                                   |     | India Delhi pop 2               | 3.3  |                               |     |
|                                   |     | Serbia pop 2                    | 2.9  |                               |     |
|                                   |     | Morocco Settata Chaouya         | 2.8  |                               |     |
|                                   |     | Chile Santiago Mixed            | 2.0  |                               |     |
|                                   |     | Sudan Mixed                     | 1.5  |                               |     |
|                                   |     | United Arab Emirates pop 2      | 1.1  |                               |     |
|                                   |     | Saudi Arabia Guraia and Hail    | 0.5  |                               |     |

| <b>B*51:01</b>                  |                      |
|---------------------------------|----------------------|
| <b>Population</b>               | <b>Frequency (%)</b> |
| Italy North pop 3               | 46.6                 |
| Oman                            | 33.1                 |
| Greece pop 8                    | 30.1                 |
| Saudi Arabia Guraia and Hail    | 26.3                 |
| Serbia pop 2                    | 23.5                 |
| Romania                         | 20.4                 |
| Argentina Rosario Toba          | 18.6                 |
| Singapore Chinese               | 15.4                 |
| Brazil Belo Horizonte Caucasian | 14.7                 |

|                                 |      |
|---------------------------------|------|
| Tunisia                         | 14.0 |
| Cuba Caucasian                  | 12.9 |
| India Delhi pop 2               | 12.1 |
| Sudan Mixed                     | 11.5 |
| France Southeast                | 11.5 |
| Austria                         | 10.0 |
| Mexico Mestizo                  | 9.8  |
| Cuba Mulatto                    | 9.5  |
| England North West              | 9.4  |
| Hong Kong Chinese               | 8.6  |
| USA Philadelphia Caucasian      | 7.4  |
| Argentina Gran Chaco Western To | 7.1  |
| Chile Santiago Mixed            | 7.0  |
| Indonesia Java Western          | 6.4  |
| Argentina Gran Chaco Eastern To | 6.0  |
| USA Caucasian Bethesda          | 5.4  |
| USA African American Bethesda   | 5.3  |
| Ireland Northern                | 5.2  |
| Ghana Ga-Adangbe                | 3.8  |
| Ireland South                   | 3.6  |
| Taiwan Siraya                   | 2.0  |
| Brazil Terena                   | 1.7  |
|                                 |      |
